# Supplementary material for: Landscapes of cellular phenotypic diversity in breast cancer xenografts and their impact on drug response
Source: PubMed Central journal article supplement (PMC8012607; doi:10.1038/s41467-021-22303-z), 2021-03-31
Supplement: 41467_2021_22303_MOESM1_ESM.pdf [file 41467_2021_22303_MOESM1_ESM.pdf]

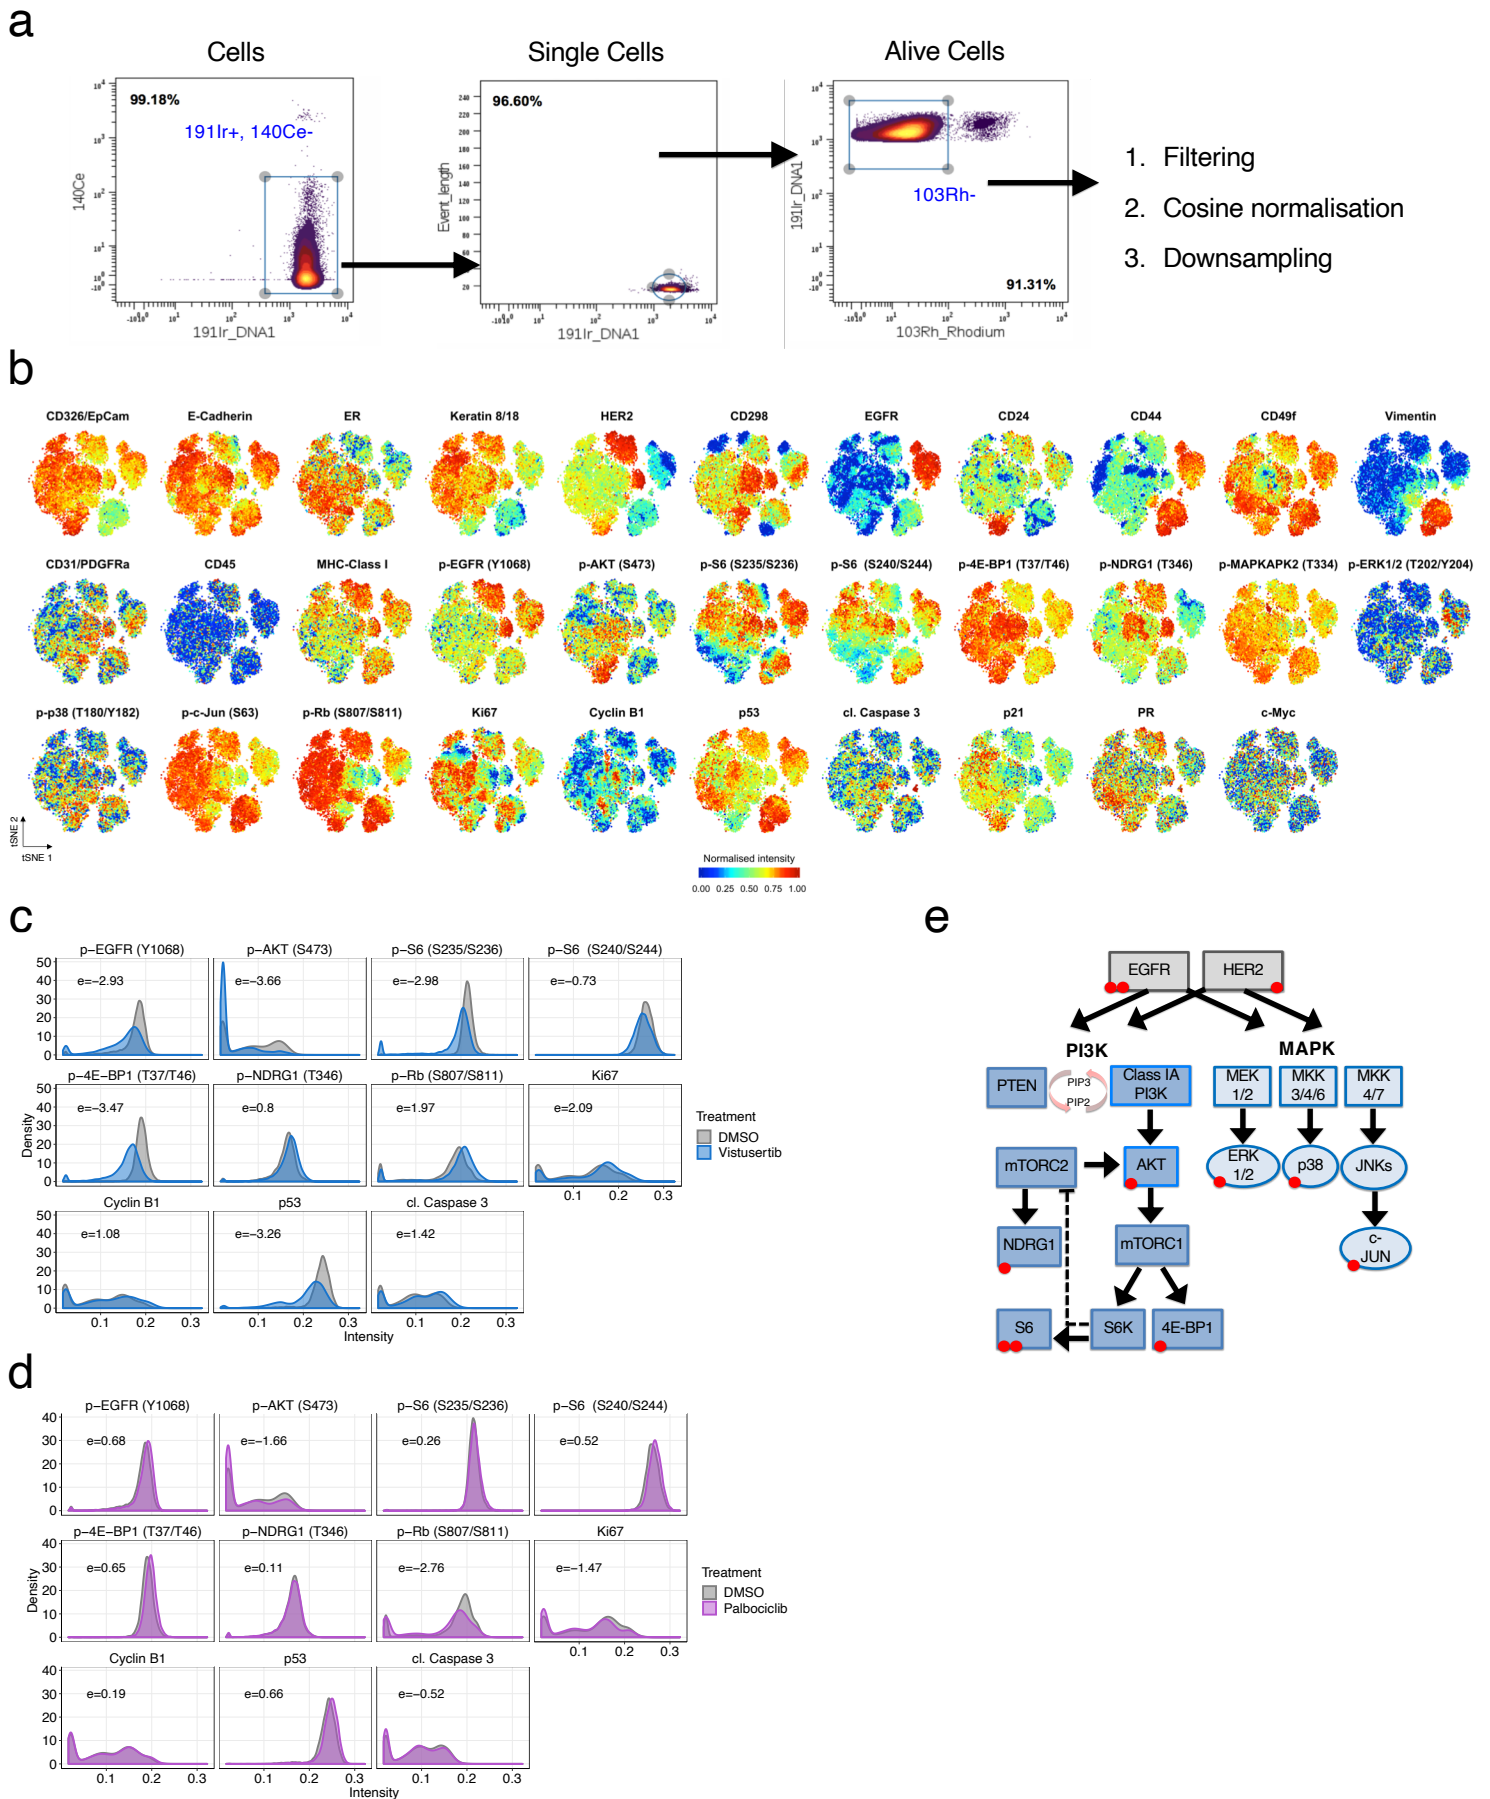

**Supplementary Figure 1 - BCMC gating and validation strategy. a)** LEFT- Gating for intact cells used cytometry bi-plots (intercalator Iridium ( $^{191}\text{Ir}$  and  $^{193}\text{Ir}$ ), and  $^{140}\text{Ce}$ , one of the elements in the EQ four element calibration beads ( $^{140/142}\text{Ce}$ ,  $^{151/153}\text{Eu}$ ,  $^{165}\text{Ho}$  and  $^{175}\text{Lu}$ )). MIDDLE- Gating for single cells using cytometry bi-plots of intercalator Iridium ( $^{191}\text{Ir}$  and  $^{193}\text{Ir}$ ) versus event length. RIGHT- Gating for live cells using cytometry bi-plots of intercalator Rhodium ( $^{103}\text{Rh}$ ), a live-dead exclusion marker for CyTOF, and Iridium. Good quality events were then imported in R and processed as detailed in the Methods. **b)** tSNE plots of 7 breast cancer cell lines shown in Fig 1b. Intensity of each BCMC marker is indicated by colour gradient. ( $N_{\text{cells}}=20,846$ ). **c)** Mass Cytometry (MC)-based intensity distribution of Oncogenic Signalling Activation (OSA) and Cell Cycle and Apoptosis (CCA) markers in MCF7 cells treated for 1 hour with: vistusertib ( $1\mu\text{M}$ ) or DMSO as a control ( $N_{\text{cells}}= 20478$ ). Differences were evaluated by Earth Mover's Distance (indicated as 'e' in the graph). **d)** MC-based intensity distribution of OSA and CCA markers in MCF7 cells treated for 1 hour with palbociclib ( $1\mu\text{M}$ ) or DMSO as a control ( $N_{\text{cells}}= 27859$ ). Differences were evaluated by Earth Mover's Distance (indicated as 'e' in the graph). **e)** Schematic representation of PI3K/mTOR and MAPK signalling pathways. Pathway components analysed by the BCMC panel are indicated (red solid circle).

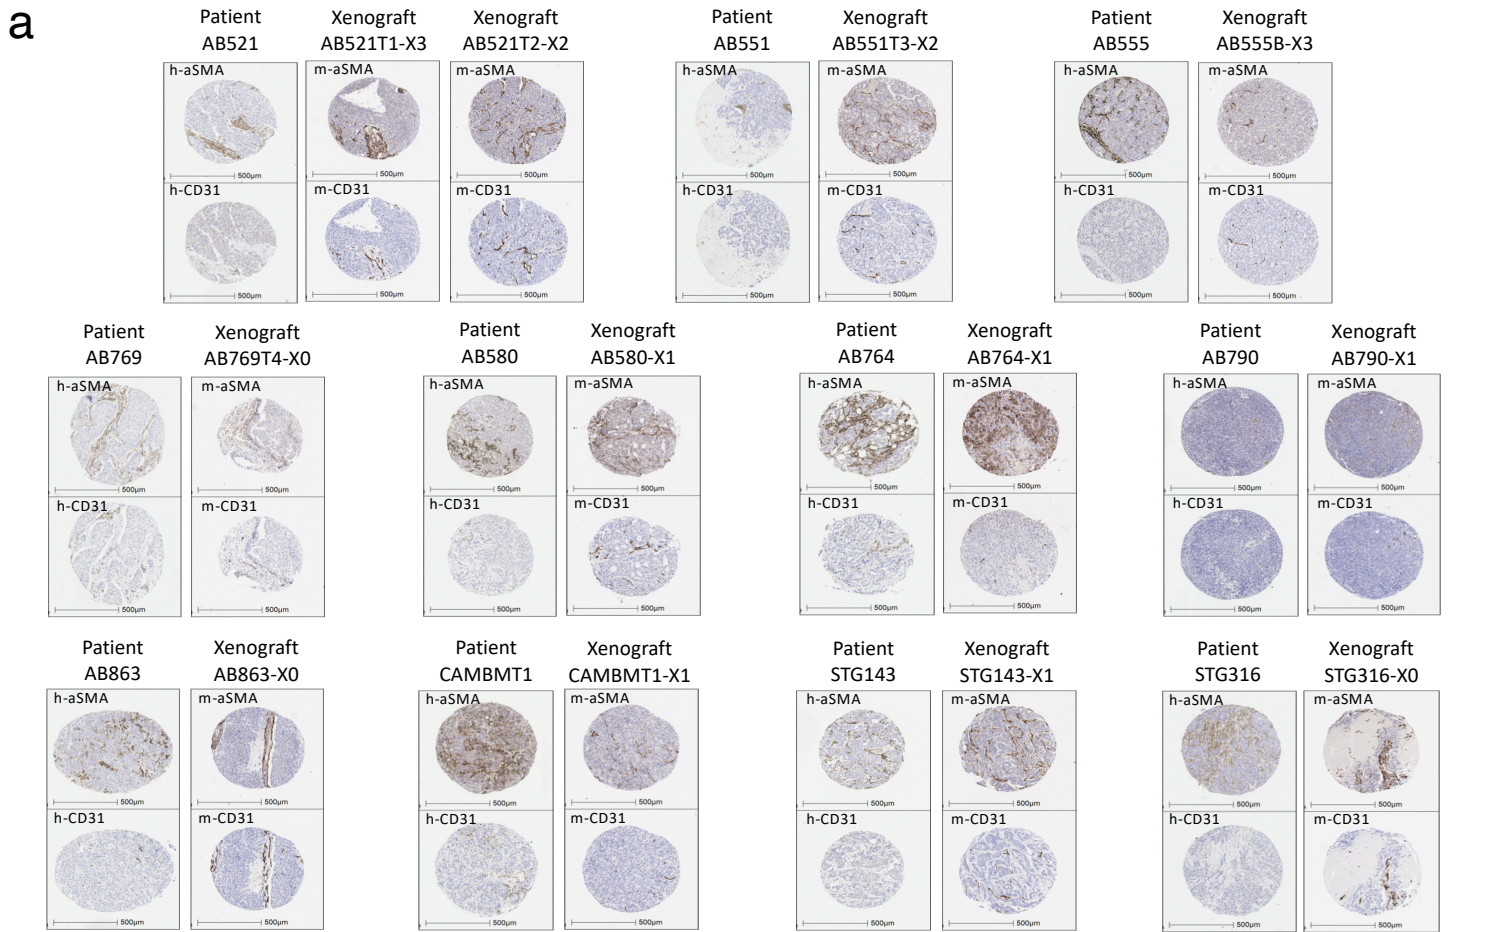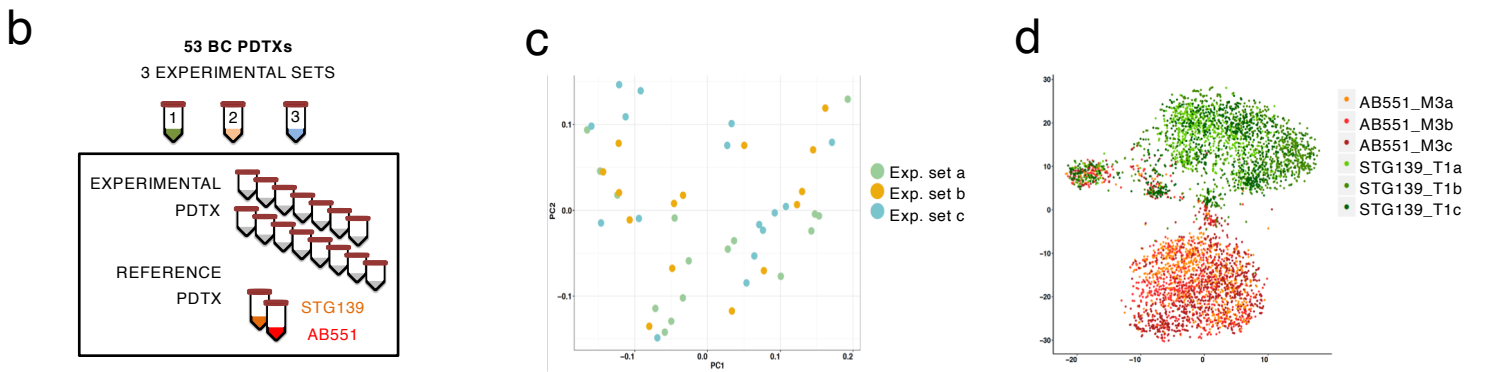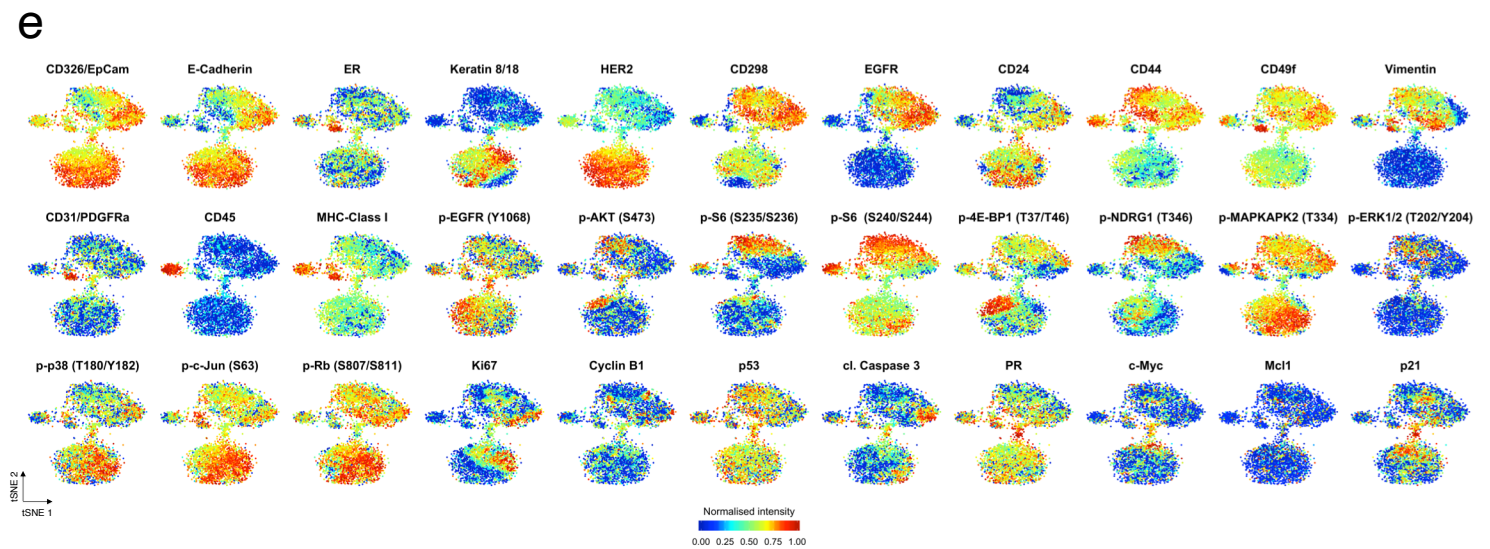

**Supplementary Figure 2 - Analysis of a cohort of breast cancer PDXs by mass cytometry. a)** Matched clinical human and PDX samples staining for aSMA and CD31. Human and mouse specific antibodies were used, respectively (indicated with 'h' and 'm', respectively). **b)** 53 samples were processed for mass cytometry in 3 experimental sets randomised for ER and HER2 status. Two PDXs (STG139 and AB551) were processed across batches to assess reproducibility and for normalization. **c)** PCA plot of the average mass cytometry profile of each sample across the three experimental batches. **d)** tSNE plot of the reference samples (STG139 and AB551) coloured by model and batch. **e)** tSNE plots as in d) showing the cell-level intensity of each BCMC protein marker.

**a**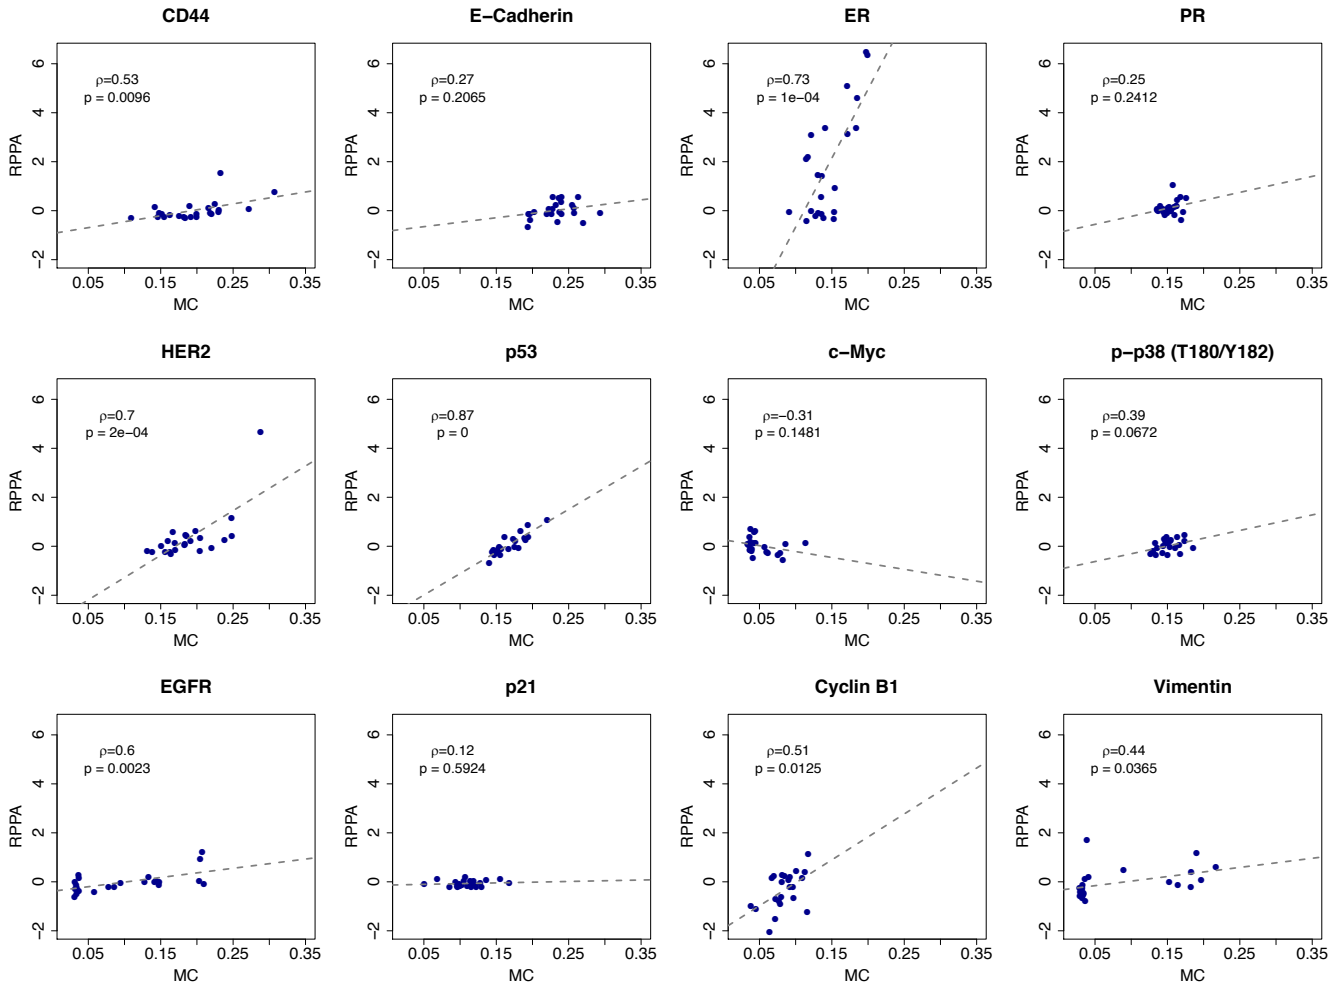**b**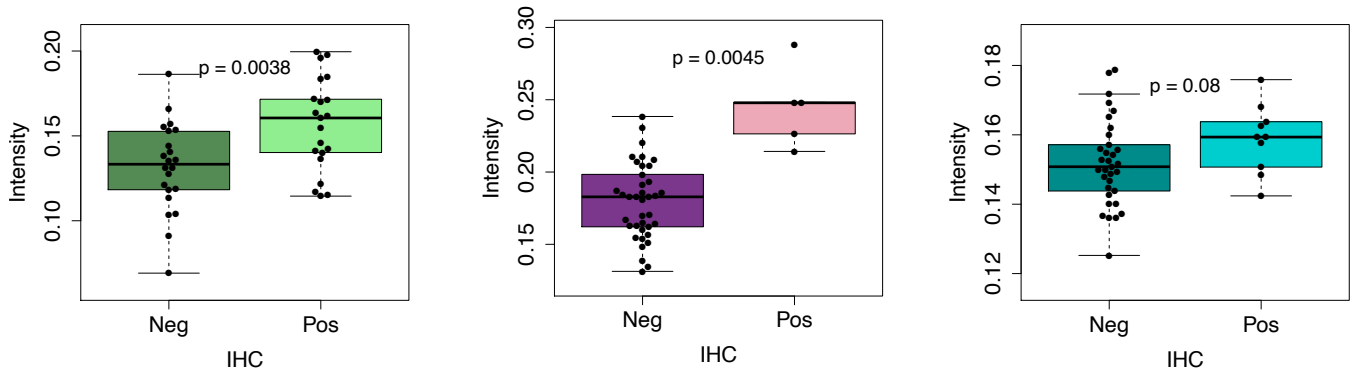

**Supplementary Figure 3 - Additional validation of BCMC panel using RPPA and IHC. a)** Scatter plots of the cell population-median Mass Cytometry (MC)-quantified versus Reverse Phage Protein Array (RPPA)-quantified expression of 12 protein markers in common between the two platforms. Pearson's  $\rho$  and two-sided p-values are indicated. **b)** Boxplots of median expression of ER, HER2 and PR by mass cytometry in samples stratified by immunohistochemistry (IHC)-determined ER, HER2 and PR status ( $p=0.0038$ ,  $p=0.0045$  and  $p=0.08$ , respectively; two-sided t-test). Boxplot elements are defined as follows: center line, median; box limits, upper and lower quartiles; whiskers, 1.5x interquartile range; points, outliers. **c)** Heatmap of median expression of Oncogenics Signaling Activation (OSA) proteins across 53 PDTXs. PDTXs used as experimental set reference samples or originating from the same patient are represented in bold. Histological and molecular data indicated in the right panels. **d)** Scatterplots of selected HTC, MSC and OSA protein marker expression levels (EpCAM/E-Cadherin, Keratin8/18/Vimentin, p-4E-BP1 (T37/T46) and pS6(S240/244)/pS6(S235/236)). Spearman's R and two-sided p-values are indicated. **e)** Heatmap of the pairwise DREMI score values of all non mouse specific markers across all PDTX cells ( $N_{\text{cells}}=405,827$ ). Marker subpanel is colour coded as in Fig. 1a.

**c**

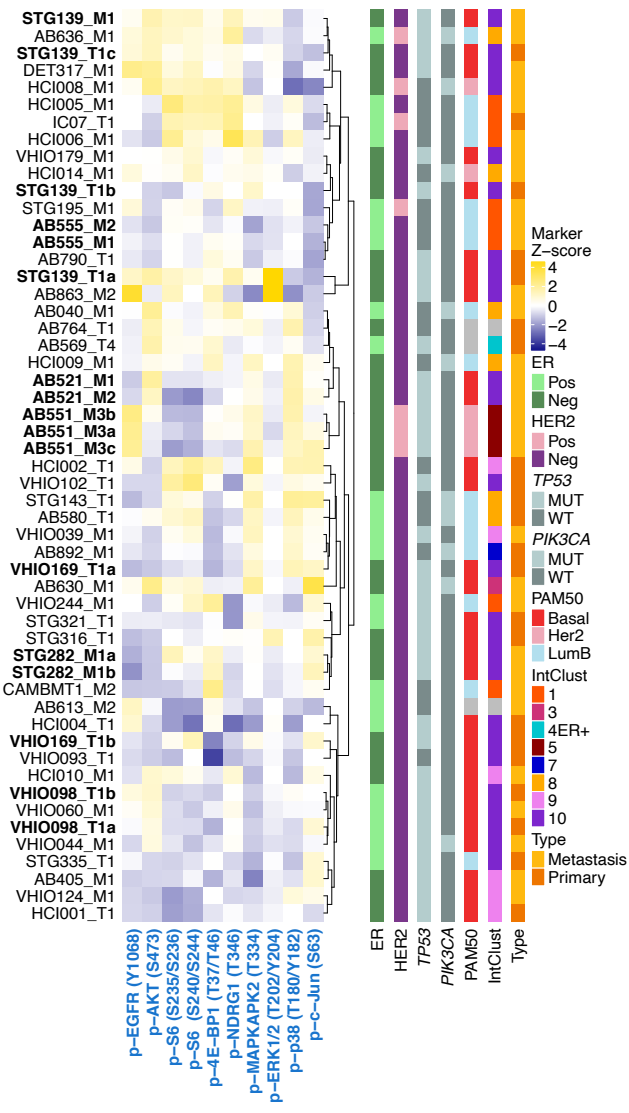

**d**

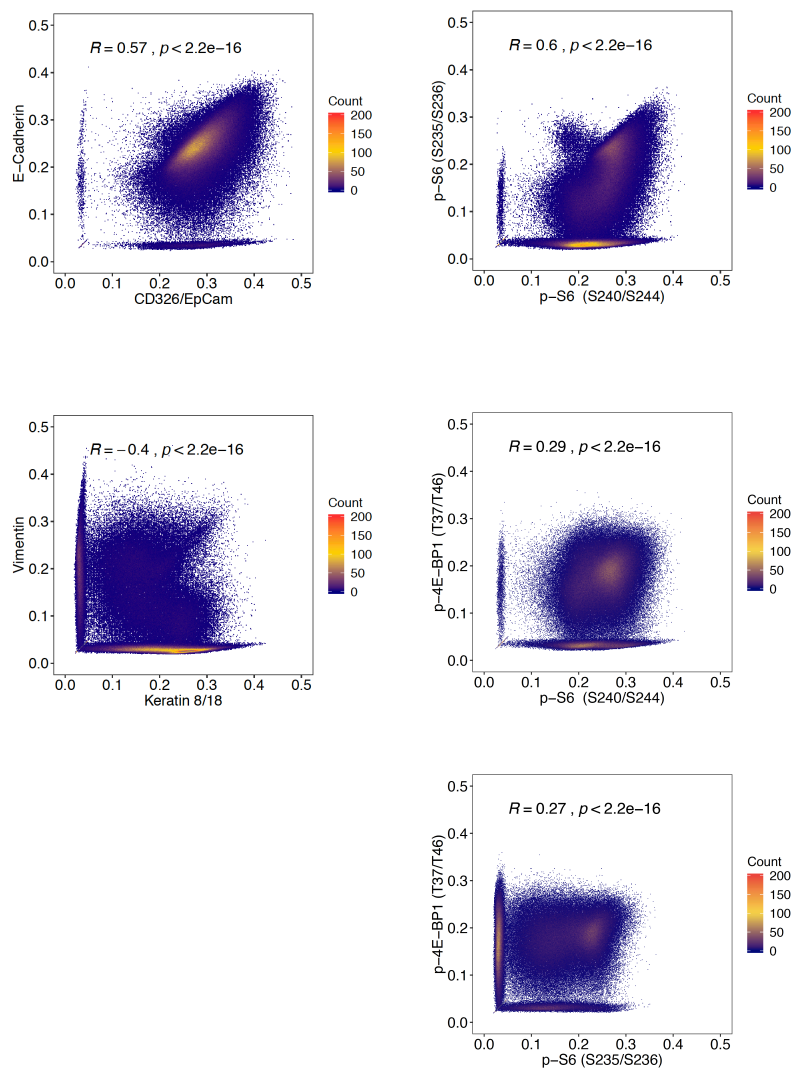

**e**

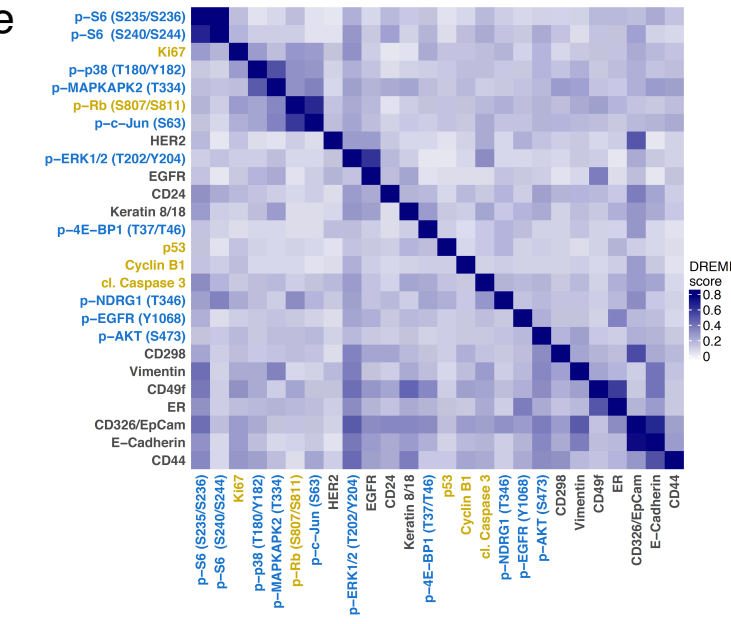

Y

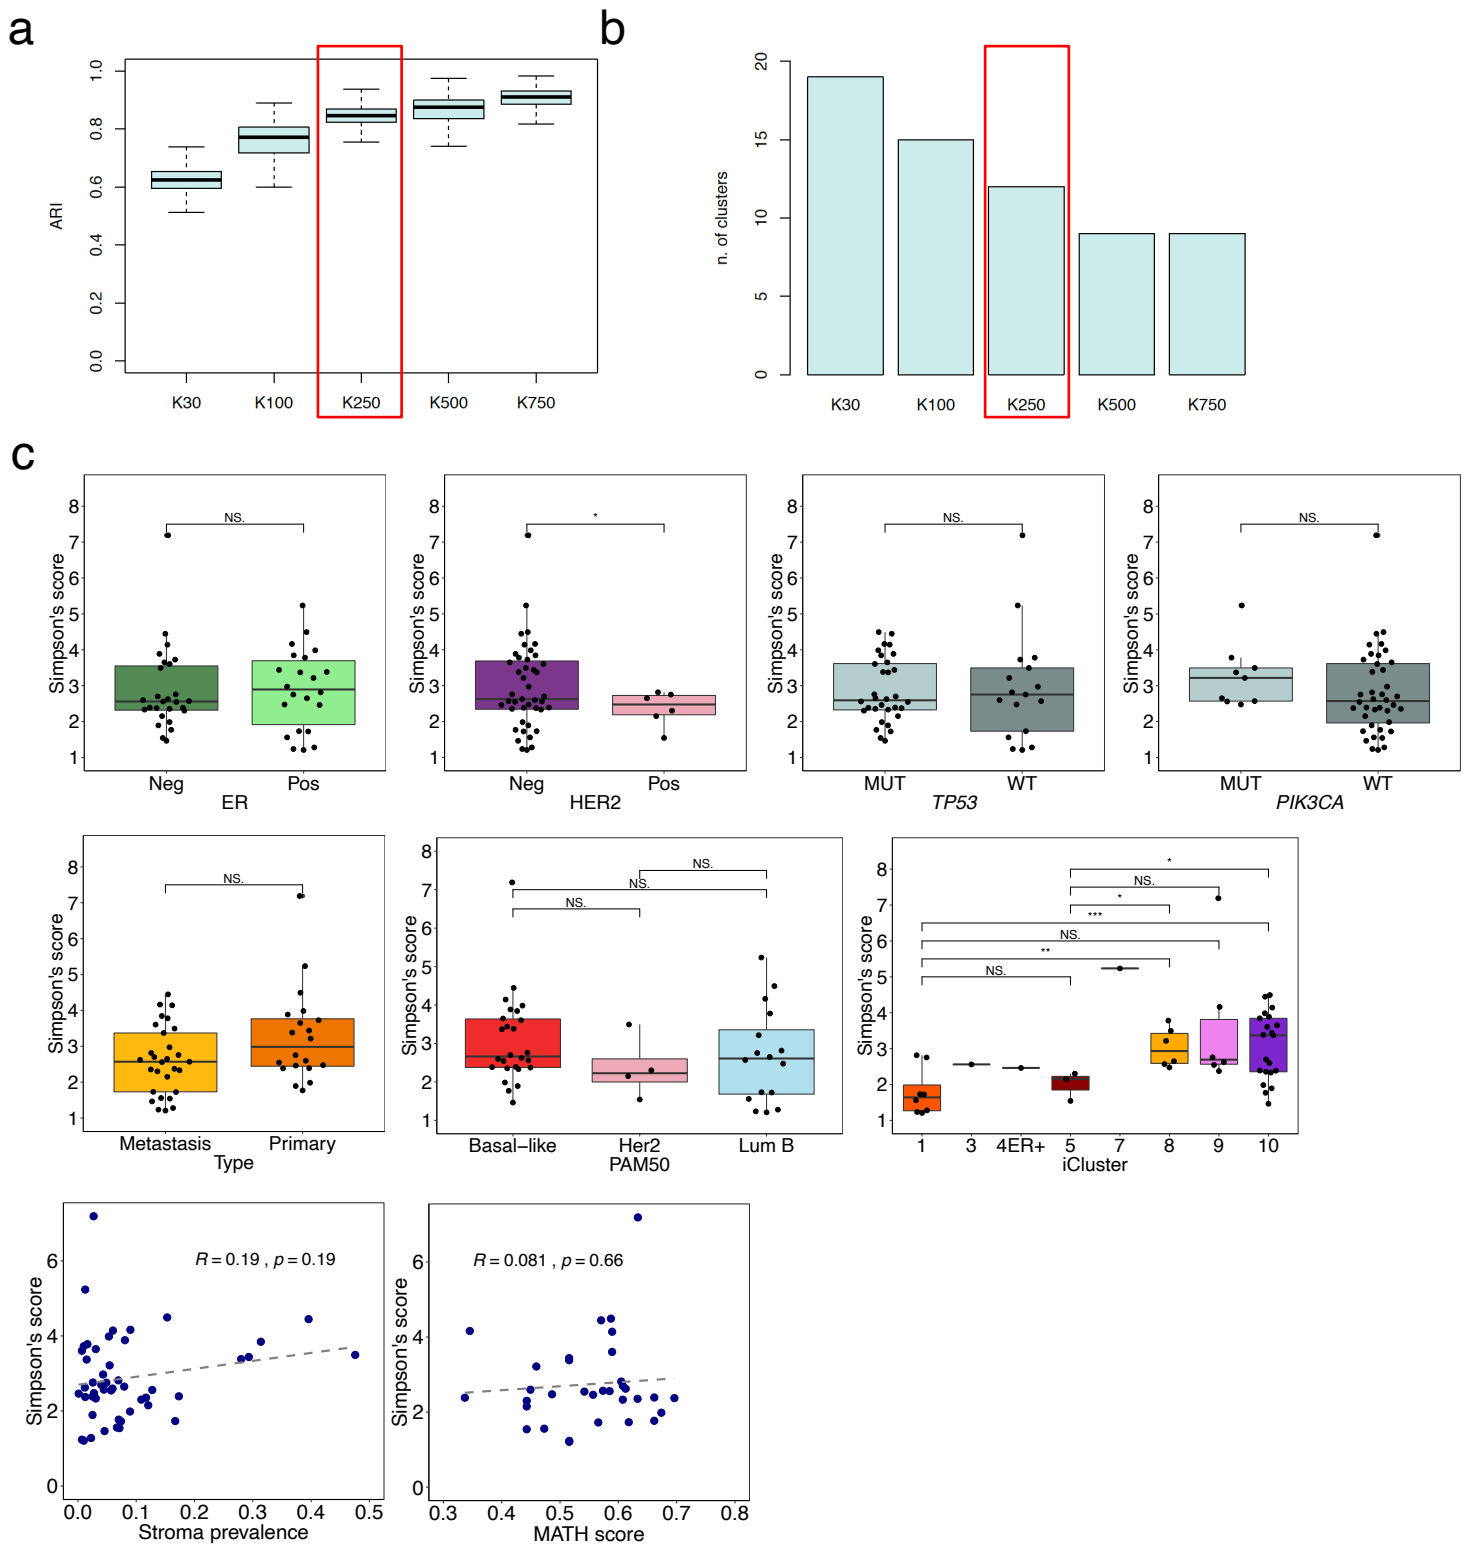

**Supplementary Figure 4 - Phenotypic diversity across PDTXs.** **a**) Adjusted Rand Index (ARI) for a range of values of PhenoGraph parameter K. Each boxplot shows ARI distribution for all pairwise clustering label comparisons ( $n = 100$  clustering iterations). Red box indicates the results for the selected K used in this study. In the box plots, the lower and upper hinges correspond to the first and third quartiles. The upper and lower whisker extends from the hinge to the largest value no further than  $1.5 * IQR$  from the hinge. Data beyond the end of the whiskers are plotted individually. **b**) Median number of clusters obtained for each value of K across 100 iterations. **c**) Boxplots of Simpson's score distribution in different subgroups of PDTX samples ( $n = 49$ ; models with specific annotation missing were excluded, see Source Data file for details) as defined by ER and HER2 status, IntClust and PAM50, somatic mutation in *TP53* and *PIK3CA* and PDTXs originating tissue (primary tumour or metastasis). In the box plots, the lower and upper hinges correspond to the first and third quartiles. The upper and lower whisker extends from the hinge to the largest value no further than  $1.5 * IQR$  from the hinge. Data beyond the end of the whiskers are plotted individually. Differences were evaluated by two-sided t-test; NS = not statistically significant, \* =  $p < 0.05$ , \*\* =  $p < 0.01$ , \*\*\* =  $p < 0.001$ . Association between Simpson's score and PDTX stroma content (computed as prevalence of S1+S2 CCs) or PDTX genomic heterogeneity (MATH score) was evaluated by linear regression analysis. **d**) tSNE cell density plots of each of the 49 PDTXs based on all markers. Only cells falling in one of the 11 human CCs were included. **e**) tSNE cell density plots (same cells as in d)) based on Human Tumour Compartment (HTC) markers only. **f**) tSNE cell density plots (same cells as in d)) based on Oncogenics Signaling Activation (OSA) markers only.

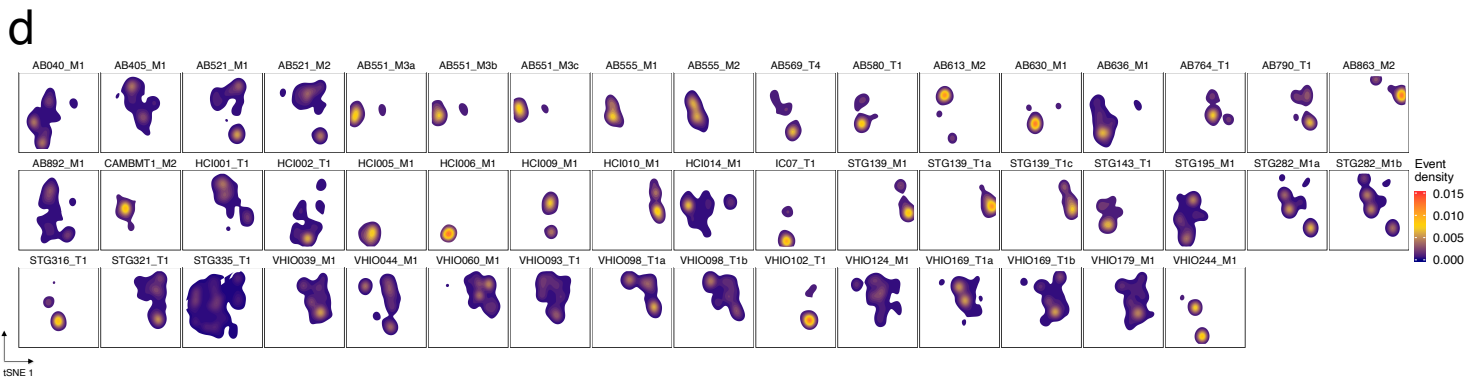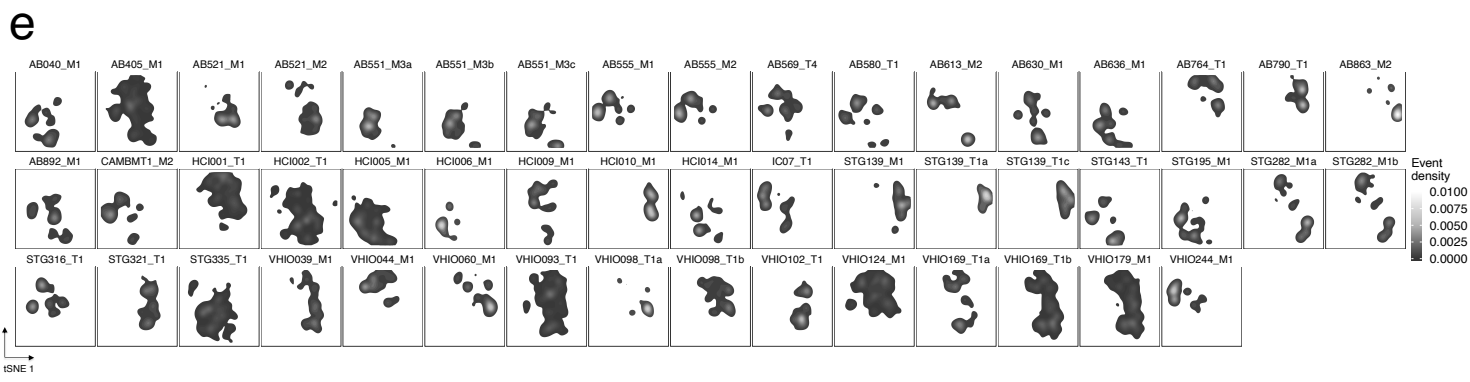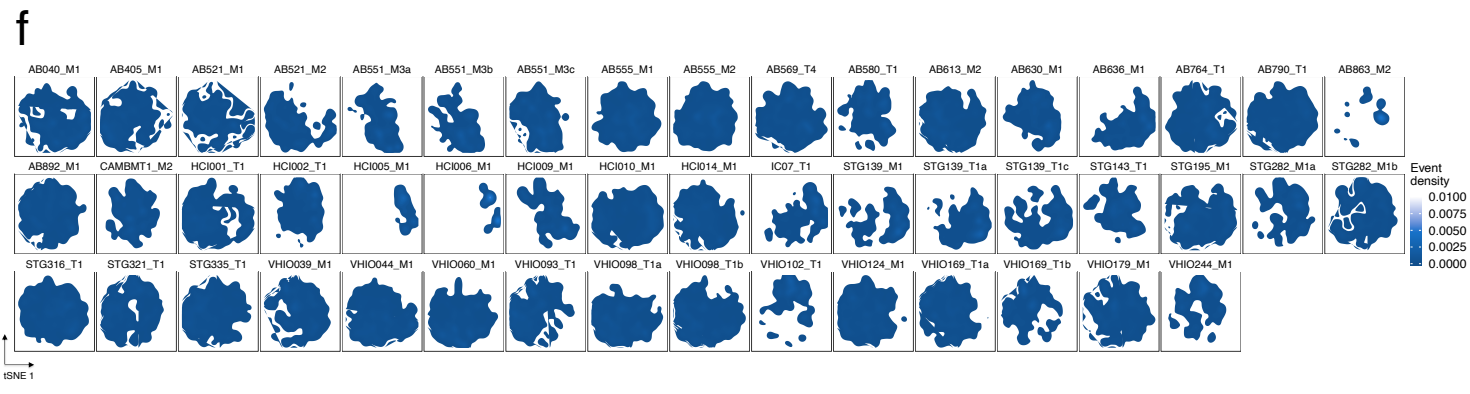

a

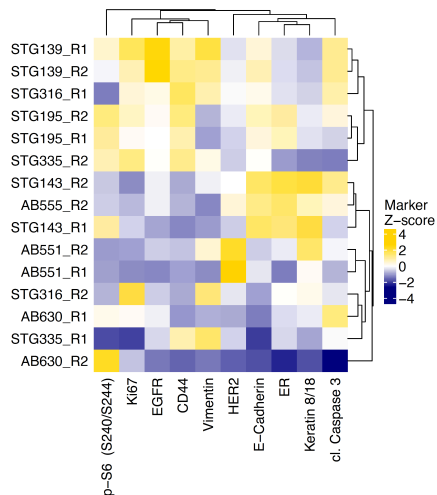

b

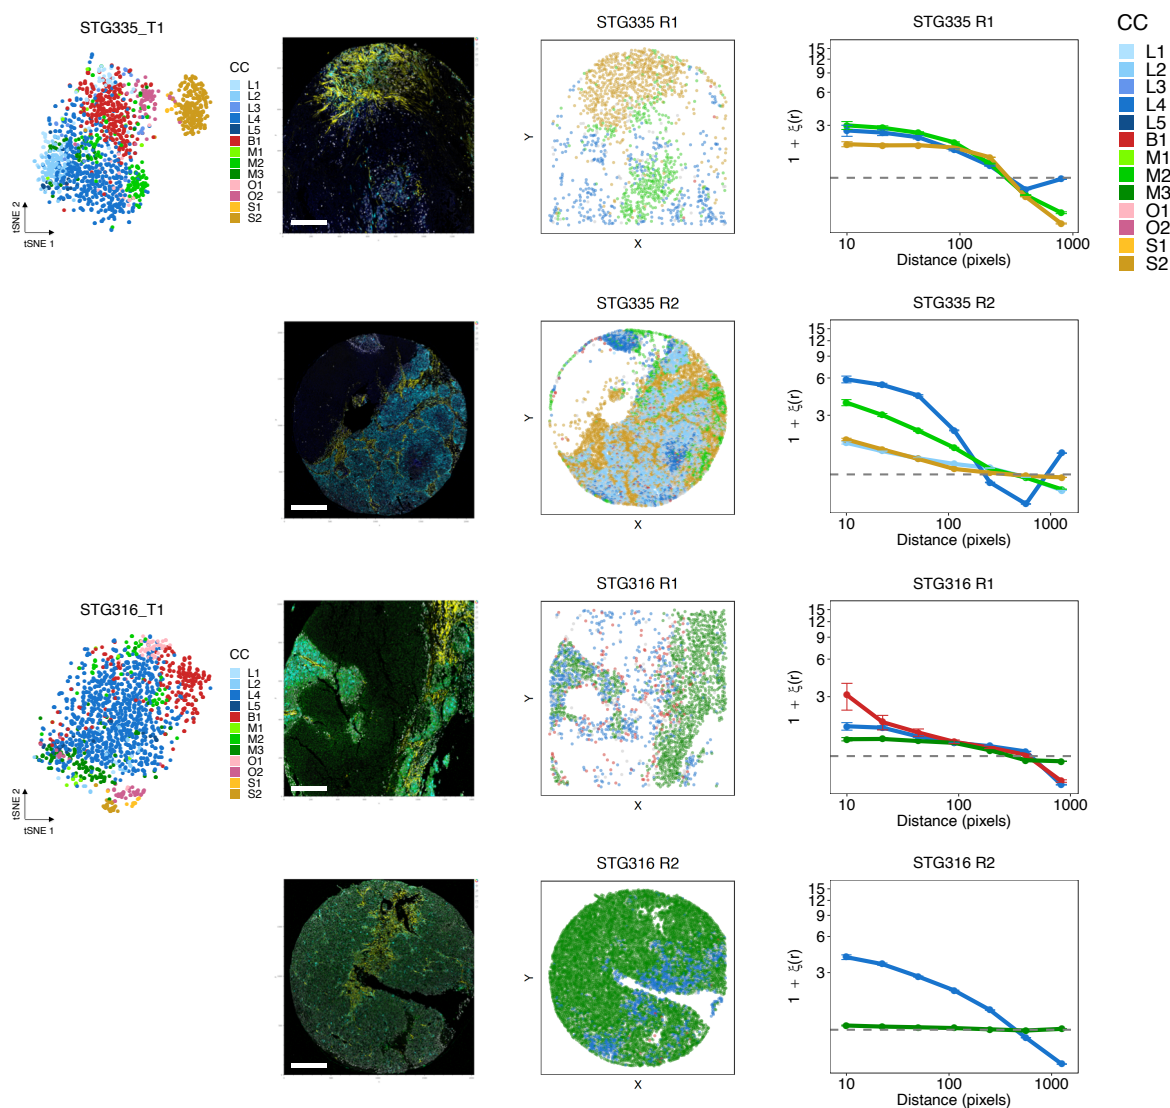

**Supplementary Figure 5 - Spatial distribution of BCMC phenotypes across PDTXs. a)** Median signals of 10 markers in cells segmented from Imaging Mass Cytometry (IMC) images ( $N_{\text{samples}}=15$ ,  $N_{\text{markers}}=10$ ,  $N_{\text{cells}}=99,336$ ). **b)** Results of mass cytometry Cell-Cluster (CC) mapping to IMC segmented cells for all models analysed. For each model, from left to right: tSNE plot based on Mass Cytometry (MC) profiling; IMC image (for one or two areas) coloured for a subset of relevant markers representative of distinct CCs; pseudo-image with segmented cells labelled according to the classifier; two-point autocorrelation analysis results for each CC showing deviation from a random cell distribution as a function of distance. Data are presented as mean values  $\pm$  SD.

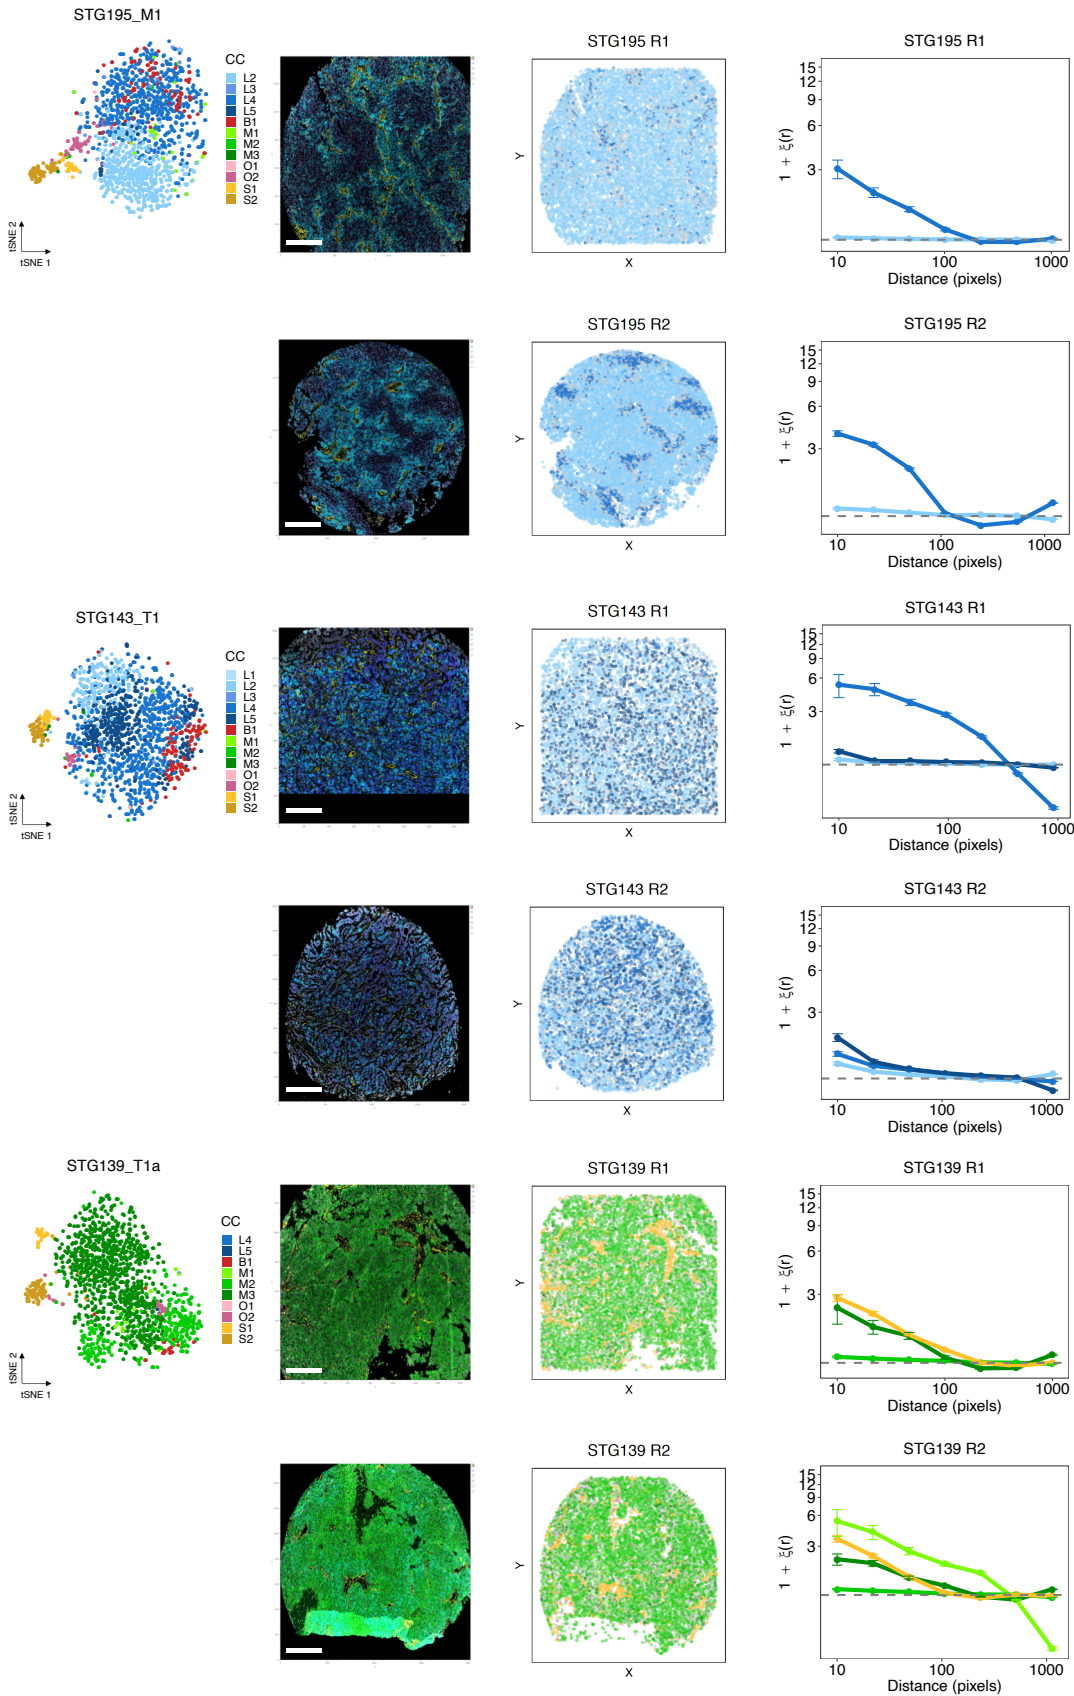



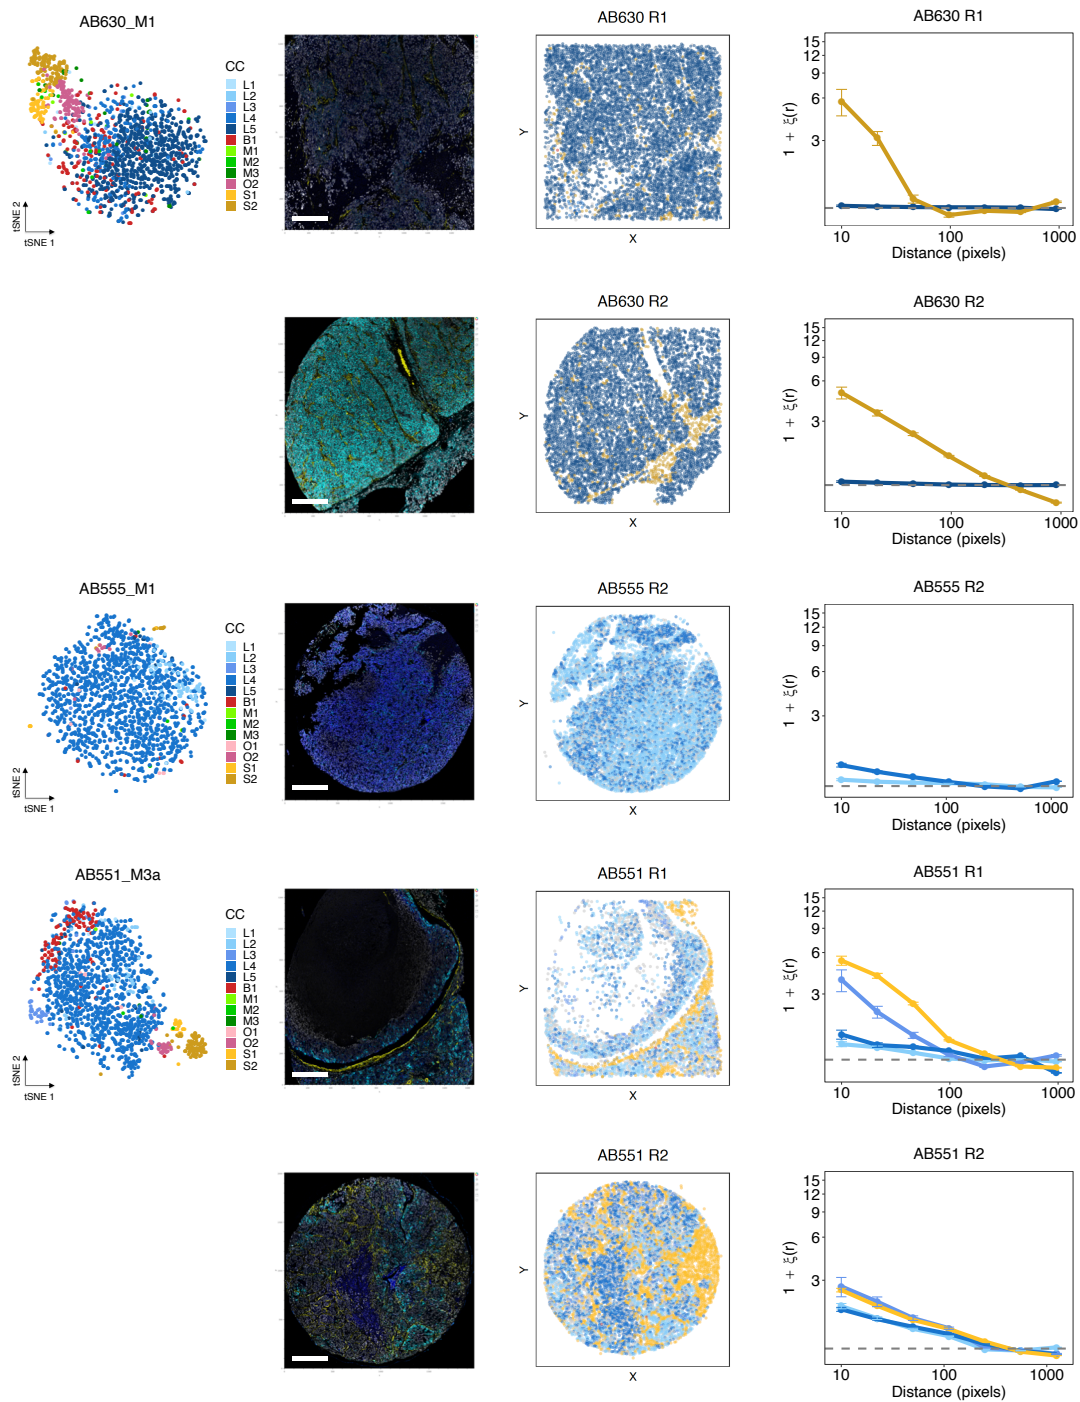

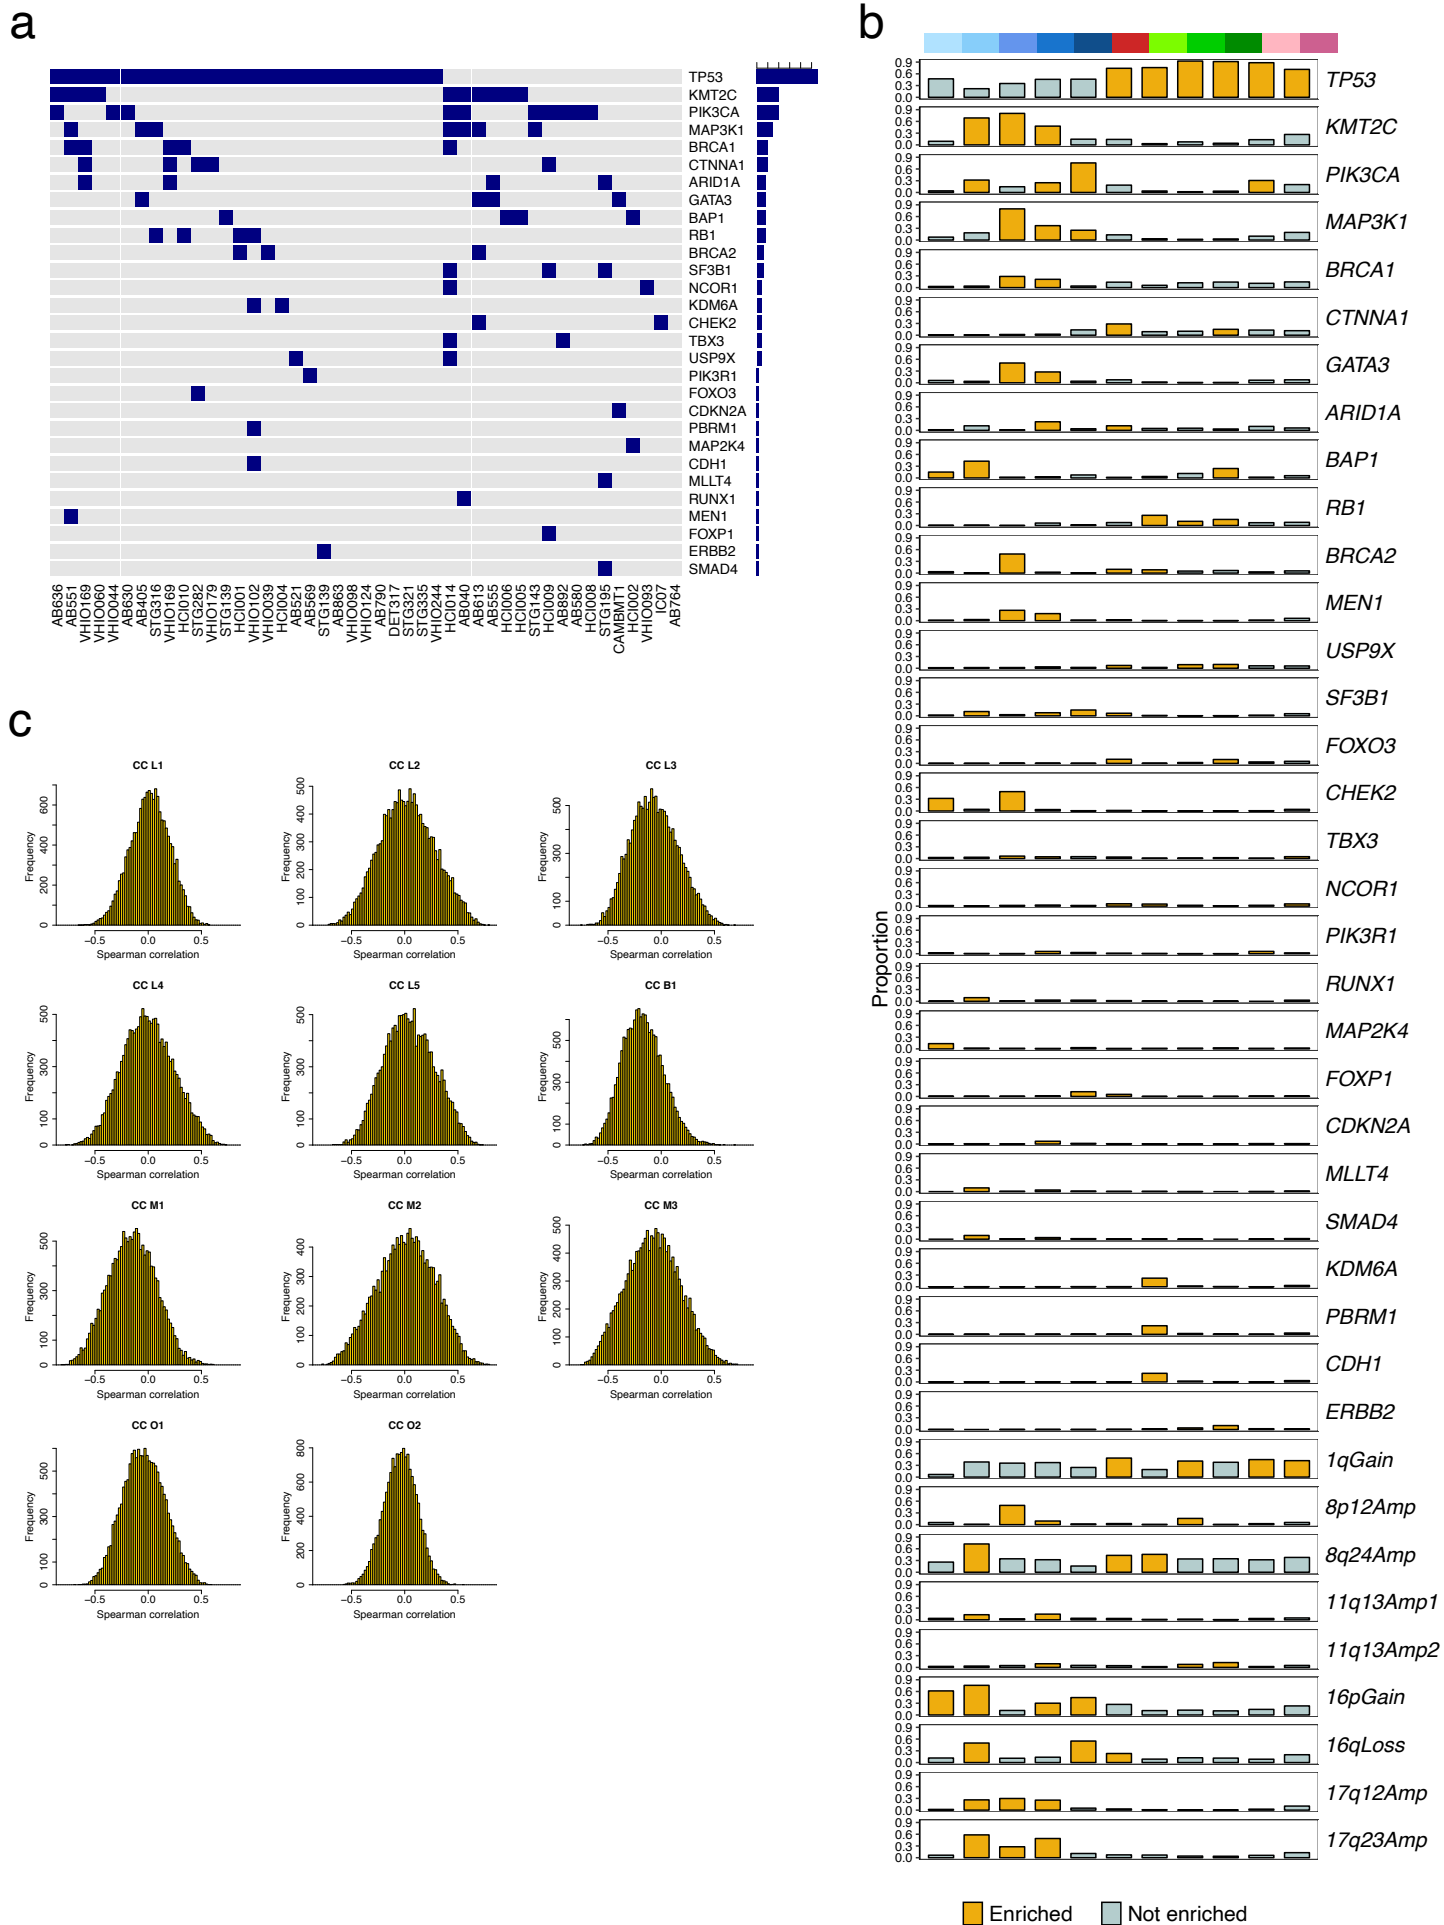

**Supplementary Figure 6 - Multidimensional molecular data integration.** **a**) Oncoprint showing somatic mutations identified in the 29 breast cancer driver genes mutated in at least one PDTX included in this study. **b**) Prevalence of major breast cancer driving genes and Copy Number Aberrations (CNAs) across the 11 human Cell-Clusters (CCs). Yellow bars - significant enrichment (hypergeometric test, two-sided adjusted  $p < 0.01$ ). **c**) Distribution of correlation values between all genes and the prevalence of each of the 11 human CCs. **d**) Scatterplots of regularised linear model prediction against observed Area Under the Curve (AUC) for 15 compounds. Linear regression  $R^2$  and associated  $p$ -values (two-sided) are reported.

d

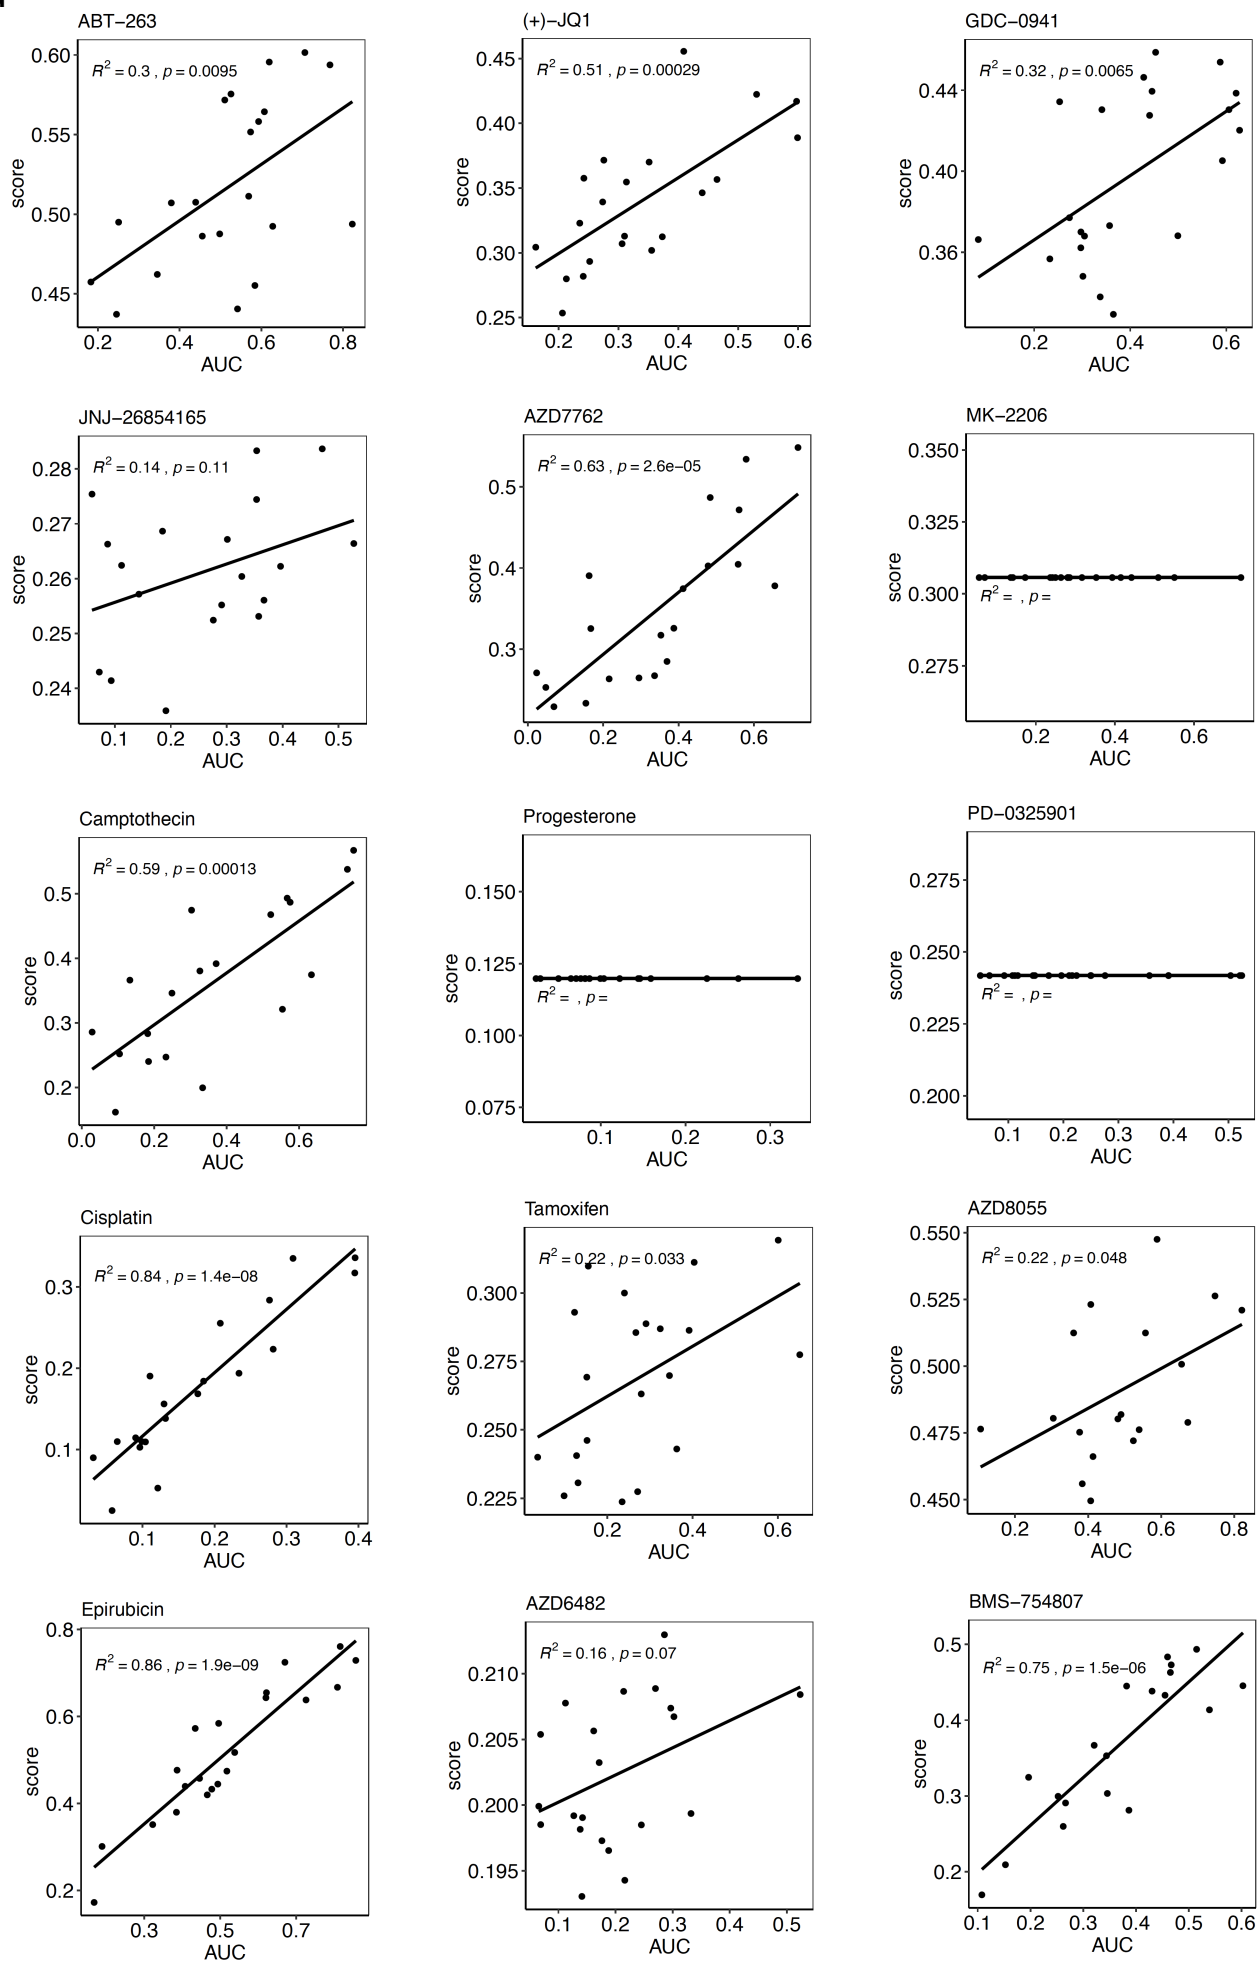

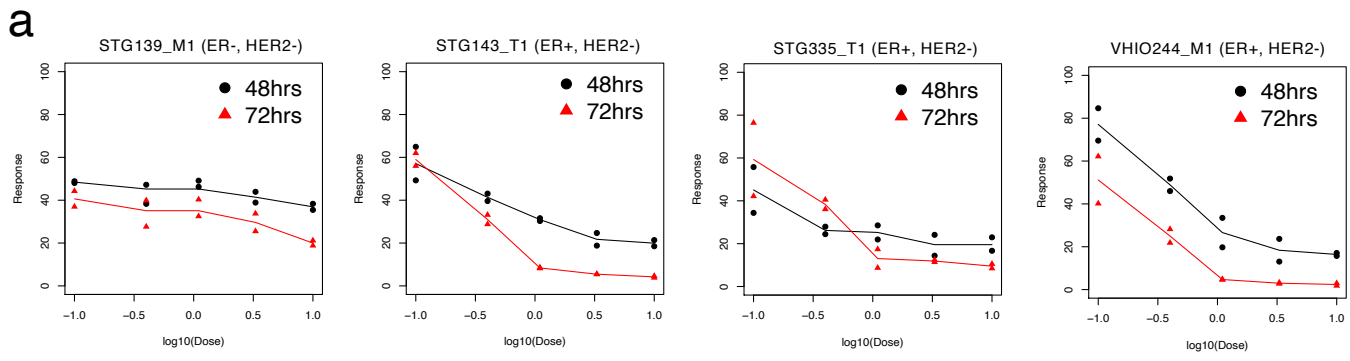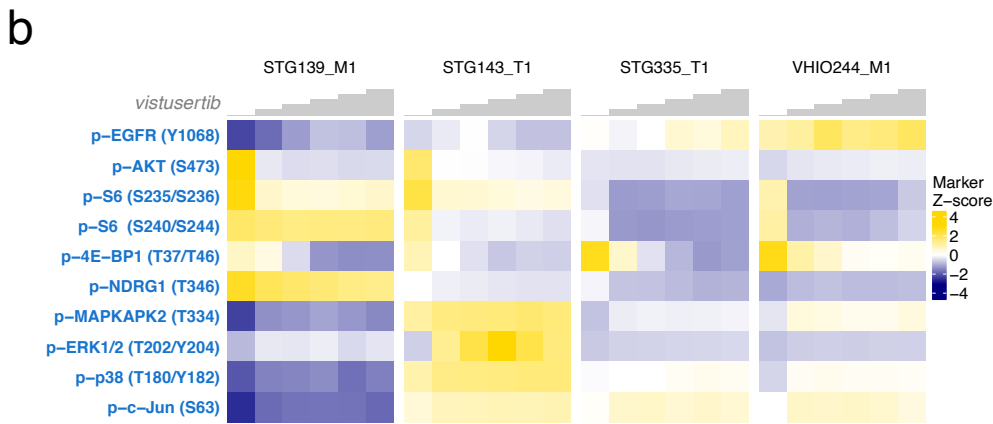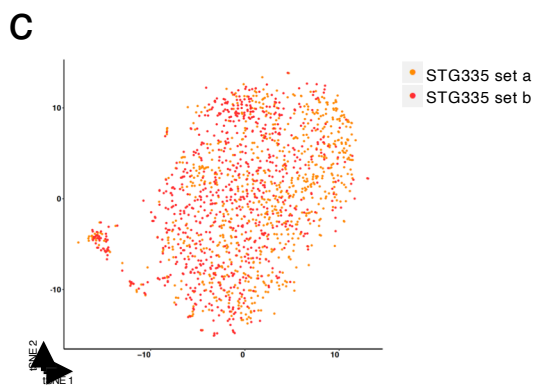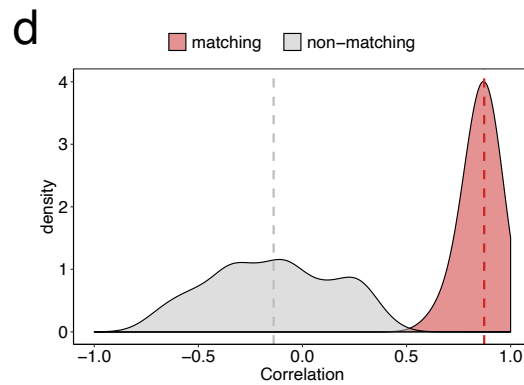

**Supplementary Figure 7 - Drug response and cellular phenotypic dynamics in PDTXs. a)** Dose-response curves, using viability Cell-Titre Glo (CTG) assay, of 4 models treated with vistusertib for 48h and 72h (dosed from 0.1 to 10 $\mu$ M). **b)** Heatmap of median signal of Oncogenic Signaling Activation (OSA) markers in 4 PDTX models untreated or vistusertib-treated (dosed from 0.1 to 10 $\mu$ M). **c)** tSNE plot of reference sample STG335 using all protein markers evaluated by the Breast Cancer Mass Cytometry (BCMC). Cells labelled according to the sample of origin. **d)** Distribution of MC-MC centroid correlation [median for matching Cell-Cluster (CC) centroids = 0.87, in red; median for non-matching CC centroids = -0.14, in grey].

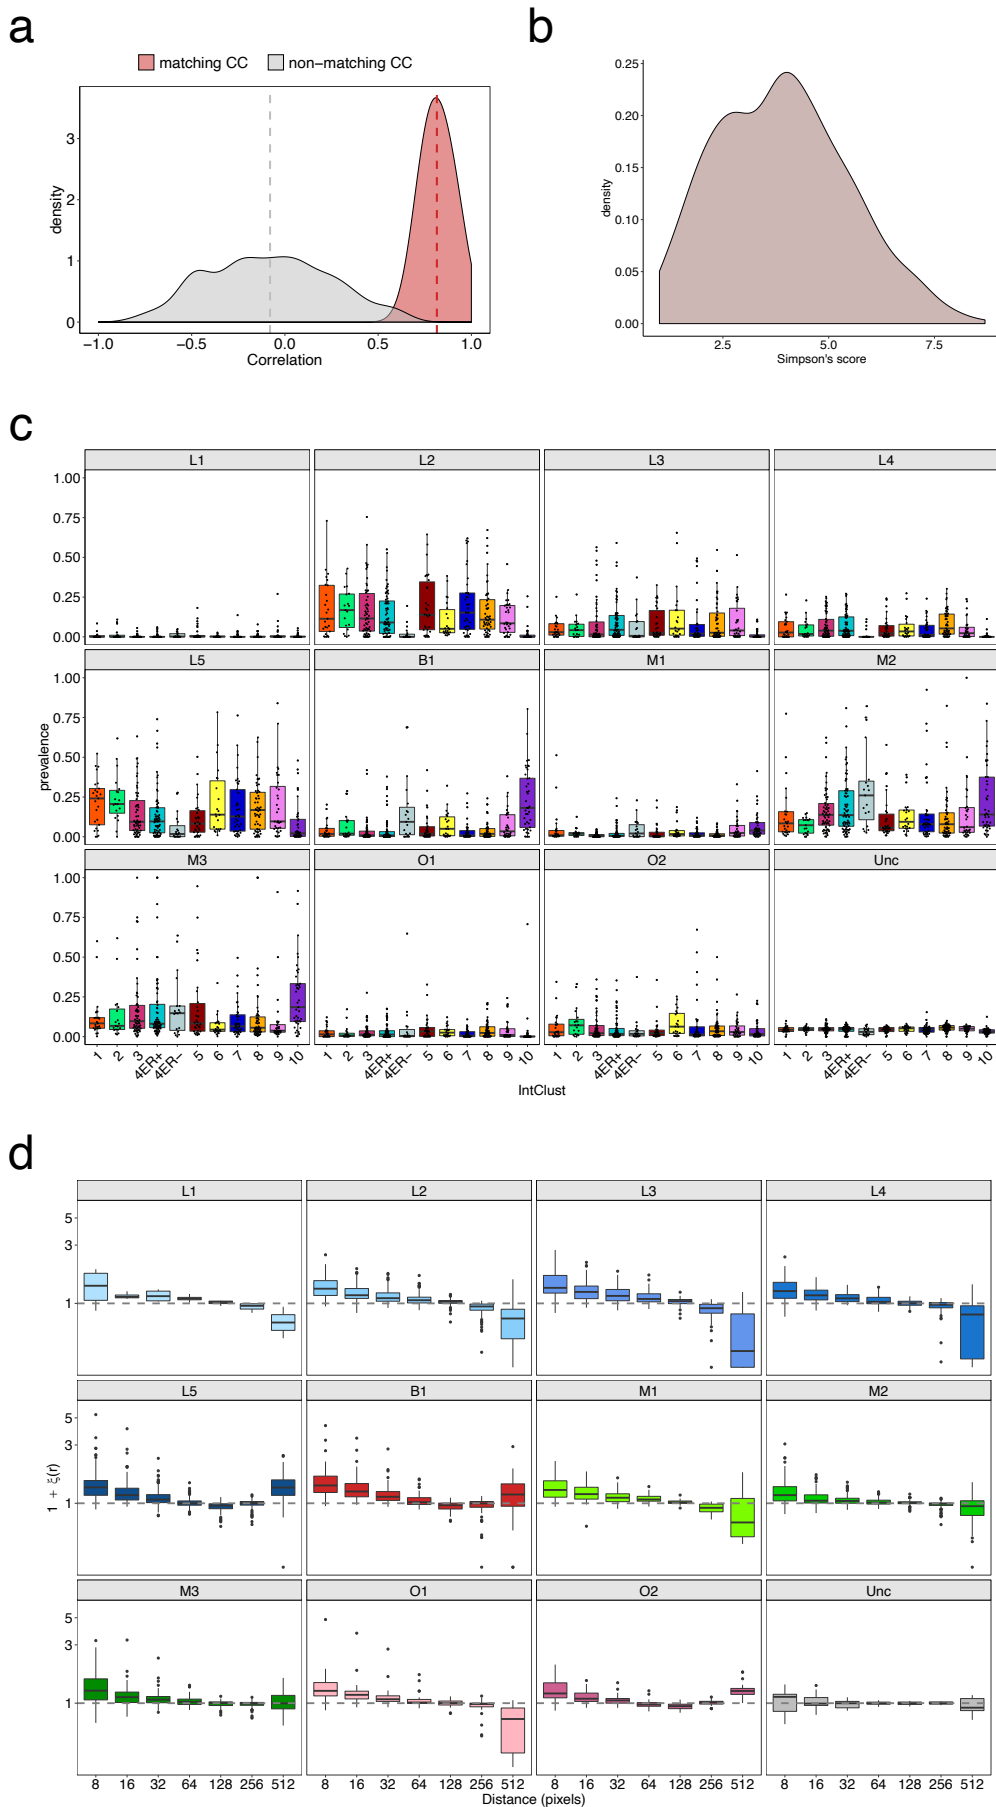

**Supplementary Figure 8 - Mapping of the 11 CCs onto IMC data from clinical samples. a)** Distribution of MC-MC centroid correlation [median for matching Cell-Cluster (CC) centroids = 0.81, in red; median for non-matching CC centroids = -0.08, in grey]. **b)** Simpson's score distribution computed across 481 Imaging Mass Cytometry (IMC) METABRIC cases and based on 11 CC proportions. **c)** Distribution of prevalence of each CC across the 11 IntClust subtypes (number of samples: IC1 = 25, IC2 = 19, IC3 = 58, IC4ER- = 19, IC4ER+ = 68, IC5 = 30, IC6 = 22, IC7 = 37, IC8 = 51, IC9 = 32, IC10 = 41). In the box plots, the lower and upper hinges correspond to the first and third quartiles. The upper and lower whisker extends from the hinge to the largest value no further than 1.5 \* IQR from the hinge. Data beyond the end of the whiskers are plotted individually. **d)** Two-point autocorrelation analysis results for each CC across all tumours quantifying the deviation from a random cell distribution as a function of distance. In the box plots, the lower and upper hinges correspond to the first and third quartiles. The upper and lower whisker extends from the hinge to the largest value no further than 1.5 \* IQR from the hinge. Data beyond the end of the whiskers are plotted individually.

**Supplementary Table 1 - MC and IMC antibodies**

| Metal | protein/target       | modification  | Clone     | Catalogue No | Supplier       | Reactivity* | Positive control | Negative control       | Validation status | Subpanel | Method | Dilution |
|-------|----------------------|---------------|-----------|--------------|----------------|-------------|------------------|------------------------|-------------------|----------|--------|----------|
| 141Pr | CD326/EpCam          |               | 9C4       | 3141006      | Fluidigm       | H           | MCF7             | MDA-MB-231             | validated         | ETC      | MC     | 1in200   |
| 142Nd | p-S6 (S240/S244)     | Ser240/Ser244 | D57.2.2E  | custom       | Fluidigm       | H, M        | MCF7             | MCF7 Vistusertib-treat | validated         | OSA      | MC     | 1in200   |
| 143Nd | p53                  |               | 7F5       | 3143018      | Fluidigm       | H           | RPPA             | RPPA                   | validated         | CCA      | MC     | 1in50    |
|       | FITCH-MHC-Class I    |               | 28-8-6    | 114606       | BD Biosciences | M           | Mouse peritoneum | Human breast cancer c  | validated         | MSC      | MC     | 1in100   |
| 146Nd | p-EGFR (Y1068)       | Tyr1068       | D7A5      | 3146007      | Fluidigm       | H, M        | RPPA             | RPPA                   | validated         | OSA      | MC     | 1in50    |
| 147Sm | CD45                 |               | 30-F11    | 3147003      | Fluidigm       | M           | Mouse peritoneum | Human breast cancer c  | validated         | MSC      | MC     | 1in200   |
| 148Nd | HER2                 |               | 29D8      | 3148011      | Fluidigm       | H, M        | SK-BR-3          | MDA-MB-231             | validated         | ETC      | MC     | 1in100   |
| 149Sm | p-4E-BP1 (T37/T46)   | Thr37/Thr46   | 236B4     | 3149005      | Fluidigm       | H, M        | MCF7             | MCF7 Vistusertib-treat | validated         | OSA      | MC     | 1in50    |
| 150Nd | CD44                 |               | IM7       | 3150018      | Fluidigm       | H, M        | MDA-MB-231       | MCF7                   | validated         | ETC/MSC  | IMC/MC | 1in50    |
| 152Sm | p-AKT (S473)         | Ser473        | D9E       | 3152005      | Fluidigm       | H, M        | MCF7             | MCF7 Vistusertib-treat | validated         | OSA      | MC     | 1in50    |
| 153Eu | Cyclin B1            |               | GNS-1     | 3153009      | Fluidigm       | H, M        | MCF7             | MCF7 Palbociclib-trea  | validated         | CCA      | MC     | 1in50    |
| 154Sm | Vimentin             |               | D21H3     | 3154014      | Fluidigm       | H, M        | MDA-MB-231       | MCF7                   | validated         | ETC/MSC  | MC     | 1in50    |
| 156Gd | p-p38 (T180/Y182)    | Thr180/Tyr182 | D3F9      | 3156002      | Fluidigm       | H, M        | MDA-MB-231       | MCF7                   | validated         | OSA      | MC     | 1in50    |
| 158Gd | E-Cadherin           |               | 24E10     | 3158021      | Fluidigm       | H, M        | MCF7             | MDA-MB-231             | validated         | ETC      | MC     | 1in200   |
| 159Tb | p-MAPKAPK2 (T334)    | Thr334        | 27B7      | 3159010      | Fluidigm       | H, M        | MDA-MB-231       | MCF7                   | validated         | OSA      | MC     | 1in50    |
| 160Gd | p-NDRG1 (T346)       | Thr346        | D98G11    | custom       | Fluidigm       | H, M        | MCF7 vehicle     | MCF7 Vistusertib-treat | validated         | OSA      | MC     | 1in100   |
|       | APC-CD31             |               | 390       | 17-0311-80   | BD Biosciences | M           | Mouse peritoneum | Human cell lines       | validated         | MSC      | MC     | 1in200   |
|       | APC-PDGFRa           |               | APAS      | 135907       | BD Biosciences | M           | Mouse peritoneum | Human cell lines       | validated         | MSC      | MC     | 1in200   |
| 163Dy | ER                   |               | D8H8      | 3163024      | Fluidigm       | H           | MCF7             | MDA-MB-231             | validated         | ETC      | IMC/MC | 1in50    |
| 164Dy | CD49f                |               | GoH3      | 3164006      | Fluidigm       | H, M        | MDA-MB-231       | MCF7                   | validated         | ETC/MSC  | MC     | 1in100   |
|       | PE-CD298             |               | LNH-94    | 341704       | BD Biosciences | H           | Mouse peritoneum | Human cell lines       | validated         | ETC      | IMC/MC | 1in50    |
| 166Er | p-Rb (S807/S811)     | Ser807/Ser811 | J112-906  | 3166011      | Fluidigm       | H           | MCF7 vehicle     | MCF7 Palbociclib-trea  | validated         | CCA      | MC     | 1in200   |
| 168Er | Ki67                 |               | B56       | 3168007      | Fluidigm       | H, M        | MCF7 vehicle     | MCF7 Palbociclib-trea  | validated         | CCA      | MC     | 1in200   |
| 169Tm | CD24                 |               | ML5       | 3169004      | Fluidigm       | H           | MCF7             | MDA-MB-231             | validated         | ETC      | MC     | 1in100   |
| 170Er | EGFR                 |               | AY13      | 3170009      | Fluidigm       | H           | MDA-MB-231       | MCF7                   | validated         | ETC      | MC     | 1in100   |
| 171Yb | p-ERK1/2 (T202/Y204) | Thr202/Tyr204 | D13.14.4E | 3171010      | Fluidigm       | H, M        | MDA-MB-231/468   | ZR-75-1                | validated         | OSA      | MC     | 1in50    |
| 172Yb | Cleaved caspase 3    |               | 5A1E      | 3172023      | Fluidigm       | H, M        | NA               | NA                     | validated         | CCA      | MC     | 1in50    |
| 173Yb | p-c-Jun (S63)        | Ser63         | 54B3      | custom       | Fluidigm       | H, M        | MDA-MB-231       | ZR-75-1                | validated         | OSA      | MC     | 1in50    |
| 174Yb | Keratin 8/18         |               | C51       | 3174014      | Fluidigm       | H           | MCF7             | MDA-MB-231             | validated         | ETC      | MC     | 1in50    |
| 175Lu | p-S6 (S235/S236)     | Ser235/Ser236 | N7-548    | 3175009      | Fluidigm       | H, M        | MCF7 vehicle     | MCF7 Vistusertib-treat | validated         | OSA      | MC     | 1in50    |
| 145Nd | PR                   |               | D8Q2J     | 3145011      | Fluidigm       | H           | RPPA             | RPPA                   | not validated     | NA       | MC     | 1in50    |
| 167Er | p21 Waf1/Cip1        |               | 12D1      | custom       | Fluidigm       | H           | RPPA             | RPPA                   | not validated     | CCA      | MC     | 1in50    |
| 176Yb | c-Myc                |               | 9E10      | 3176012      | Fluidigm       | H           | RPPA             | RPPA                   | not validated     | NA       | MC     | 1in50    |
| 144Nd | a-FITCH              |               | FIT-22    | 3144006      | Fluidigm       | NA          | NA               | NA                     | NA                | NA       | MC     | 1in300   |
| 162Dy | a-APC                |               | APC003    | 3162006      | Fluidigm       | NA          | NA               | NA                     | NA                | NA       | MC     | 1in300   |
| 165Ho | a-PE                 |               | PE001     | 3165015      | Fluidigm       | NA          | NA               | NA                     | NA                | NA       | IMC/MC | 1in300   |

  

| Metal | protein/target  | modification | Clone         | Catalogue No | Supplier       | Reactivity* | Validation status | Panel arm | Method    | Dilution |                 |        |
|-------|-----------------|--------------|---------------|--------------|----------------|-------------|-------------------|-----------|-----------|----------|-----------------|--------|
| 143Nd | Vimentin        |              | D21H3         | 3143027D     | Fluidigm       | H, M        | PDTX TMA          | PDTX TMA  | validated | HTC/MSC  | IMC/MC          | 1in200 |
| 148Nd | SMA             |              | 1A4           | MA511547     | custom         | H, M        | PDTX TMA          | PDTX TMA  | validated | MSC      | IMC             | 1in100 |
| 151Eu | HER2            |              | D8F12         | 4290BF       | custom         | H           | PDTX TMA          | PDTX TMA  | validated | HTC      | IMC/MC (differe | 1in70  |
| 160Gd | CD44            |              | IM7           | 14-0441-82   | custom         | H, M        | PDTX TMA          | PDTX TMA  | validated | HTC      | IMC/MC          | 1in50  |
| 163Dy | ER              |              | D8H8          | 3163024A     | Fluidigm       | H           | PDTX TMA          | PDTX TMA  | validated | HTC      | IMC/MC          | 1in100 |
| 165Ho | a-PE            |              | PE001         | 3165015      | Fluidigm       | NA          | PDTX TMA          | PDTX TMA  | validated | NA       | IMC/MC          | 1in30  |
|       | PE-CD298        |              | LNH-94        | 341704       | BD Biosciences | H           | PDTX TMA          | PDTX TMA  | validated | HTC      | IMC/MC          | 1in30  |
| 167Er | E-Cadherin      |              | 36/E-Cadherin | 610182       | custom         | H, M        | PDTX TMA          | PDTX TMA  | validated | HTC      | IMC/MC (differe | 1in100 |
| 168Er | Ki67            |              | B56           | 3168022D     | Fluidigm       | Cross       | PDTX TMA          | PDTX TMA  | validated | CCA      | IMC/MC          | 1in100 |
| 169Tm | EGFR            |              | AY13          | 352901       | custom         | H           | PDTX TMA          | PDTX TMA  | validated | HTC      | IMC/MC          | 1in100 |
| 170Er | pS6 (S240/S244) | S240/S244    | D57.2.2E      | 4858BF       | custom         | H, M        | PDTX TMA          | PDTX TMA  | validated | OSA      | IMC/MC          | 1in200 |
| 172Yb | cl.caspase 3    |              | 5A1E          | 3172027D     | Fluidigm       | H, M        | PDTX TMA          | PDTX TMA  | validated | CCA      | IMC/MC          | 1in50  |
| 174Yb | Keratin 8/18    |              | C51           | 3174022D     | Fluidigm       | H           | PDTX TMA          | PDTX TMA  | validated | HTC      | IMC/MC          | 1in50  |

  

| Metal | protein/target | modification | Clone      | Catalogue No | Supplier       | Reactivity* | Validation status | Panel arm | Method    | Dilution/Concentration | Antigen retrieval |                             |
|-------|----------------|--------------|------------|--------------|----------------|-------------|-------------------|-----------|-----------|------------------------|-------------------|-----------------------------|
|       | CD31           |              | D8V9E      | 77699        | Cell Signaling | M           | PDTX TMA          | HUMAN TMA | validated | IHC                    | 1in100            | Tris-EDTA, 20' at 100C      |
|       | ASMA           |              | polyclonal | ab5694       | Abcam          | M           | PDTX TMA          | HUMAN TMA | validated | IHC                    | 1in500            | Tris-EDTA, 10' at 100C      |
|       | ASMA           |              | 1A4        | A2547        | Sigma Aldrich  | H           | HUMAN TMA         | PDTX TMA  | validated | IHC                    | 1in2000           | None                        |
|       | CD31           |              | JC70A      | M0823        | Dako           | H           | HUMAN TMA         | PDTX TMA  | validated | IHC                    | 4.1ug/ml          | Sodium Citrate, 20' at 100C |

\*according to the manufacturer

## Supplementary Table 2 - Cell line metadata

| Model_ID   | Species | Experiment         | Experimental Set | Treatment   | Dose (uM) | Viability (%) | ER_IHC | HER2_IHC | PR_IHC | PAM50   |
|------------|---------|--------------------|------------------|-------------|-----------|---------------|--------|----------|--------|---------|
| mPER       | mouse   | MSC validation     | a                | NA          | NA        | NT            | NA     | NA       | NA     | NA      |
| 4t09       | mouse   | MSC validation     | a                | NA          | NA        | >90           | NA     | NA       | NA     | NA      |
| MCF7       | human   | MSC validation     | a                | NA          | NA        | >90           | Pos    | Neg      | NA     | Luminal |
| MDA-MB-231 | human   | MSC validation     | a                | NA          | NA        | >90           | Neg    | Neg      | NA     | Basal   |
| MCF7       | human   | HTC validation     | a                | NA          | NA        | >90           | Pos    | Neg      | NA     | Luminal |
| MDA-MB-231 | human   | HTC validation     | a                | NA          | NA        | >90           | Neg    | Neg      | NA     | Basal   |
| ZR-75-1    | human   | HTC validation     | a                | NA          | NA        | >90           | Pos    | Neg      | NA     | Luminal |
| CAMA1      | human   | HTC validation     | a                | NA          | NA        | >90           | Pos    | Neg      | NA     | Luminal |
| T47D       | human   | HTC validation     | a                | NA          | NA        | >90           | Pos    | Neg      | NA     | Luminal |
| SK-BR-3    | human   | HTC validation     | a                | NA          | NA        | >90           | Neg    | Pos      | NA     | Her2    |
| MDA-MB-468 | human   | HTC validation     | a                | NA          | NA        | >90           | Neg    | Neg      | NA     | Basal   |
| MCF7       | human   | CCA/OSA validation | a                | DMSO        | NA        | >90           | Pos    | Neg      | NA     | Luminal |
| MCF7       | human   | CCA/OSA validation | a                | Vistusertib | 1         | >90           | Pos    | Neg      | NA     | Luminal |
| MCF7       | human   | CCA/OSA validation | a                | Palbociclib | 1         | >90           | Pos    | Neg      | NA     | Luminal |







**Supplementary Table 4 - Number of samples and cells analysed**

| <b>Experiment</b>      | <b>N in-gate events</b> | <b>N events after filtering</b> | <b>N samples (inc. replicates)</b> | <b>N samples removed post QC</b> | <b>N downsampled events per sample</b> | <b>N events after downsampling</b> |
|------------------------|-------------------------|---------------------------------|------------------------------------|----------------------------------|----------------------------------------|------------------------------------|
| HTC validation         | 21000                   | 20846                           | 7                                  | 0                                | 2900                                   | 20300                              |
| CCA/OSA validation     | 38542                   | 36582                           | 3                                  | 0                                | 2900                                   | 8700                               |
| MSC validation         | 27900                   | 26154                           | 4                                  | 0                                | NA                                     | NA                                 |
| PDTX characterisation  | 435956                  | 405827                          | 53                                 | 4                                | 1600                                   | 78400                              |
| PDTX target engagement | 923269                  | 461634                          | 31                                 | 0                                | 1700                                   | 40800                              |
| IMC in PDTX            | 106569                  | 99336                           | 15                                 | 0                                | NA                                     | NA                                 |
| <b>TOTAL</b>           | <b>1553236</b>          | <b>1050379</b>                  | <b>113</b>                         |                                  |                                        |                                    |
